# Supplementary material
Source: ML conference proceedings conference paper supplement (https://openaccess.thecvf.com/content/WACV2022/html/Nayak_DAD_Data-Free_Adversarial_WACV_2022_paper.html)
Supplement: Supplementary file 1 [file Nayak_DAD_Data-Free_Adversarial_WACV_2022_supplemental.pdf]

**Supplementary for:**  
**“DAD: Data-free Adversarial Defense at Test Time”**

Gaurav Kumar Nayak\*      Ruchit Rawal\*      Anirban Chakraborty

Department of Computational and Data Sciences  
 Indian Institute of Science, Bangalore, India  
 {gauravnayak, ruchitrawal, anirban}@iisc.ac.in

**1. Qualitative Analysis of Low Frequency Component of adversarial data at different Radius**

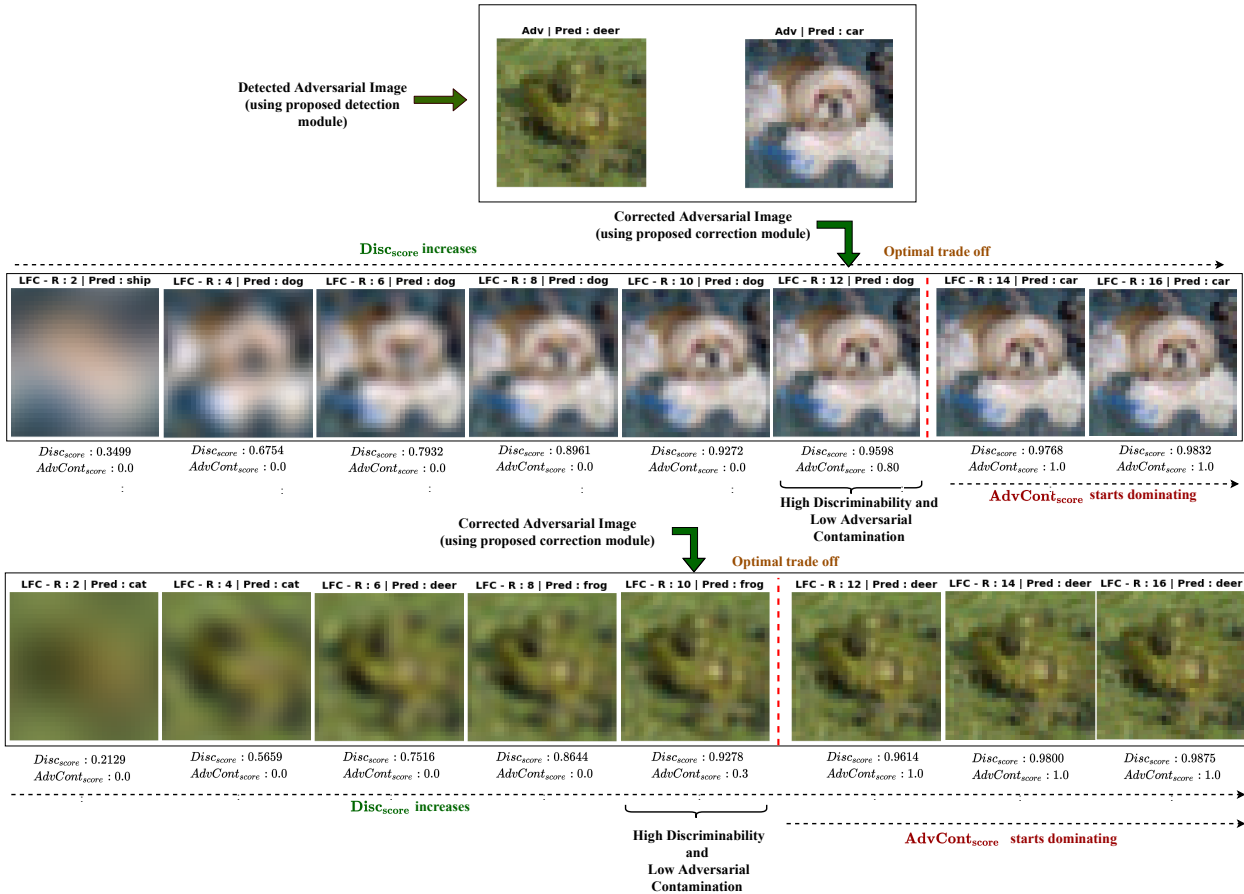

Figure 1. Visually demonstrating the trade off between discriminability and adversarial contamination. Our correction module suitably handles it through the proposed Algorithm 1 in the main draft by selecting LFC in the spatial domain at optimal radius ( $r^*$ ) having high  $Disc_{score}$  and low  $AdvCont_{score}$  i.e. max radius at which  $Disc_{score}$  dominates over  $AdvCont_{score}$ . At radius ( $r^* + 1$ ), the adversarial contamination starts strongly influencing the predictions of pretrained model ( $T_m$ ) and consequently  $T_m$ 's prediction for all subsequent radius remains same as the detected adversarial image's prediction. As shown,  $r^* + 1$  is 14 and 12 in the top and bottom row respectively. Thus, we select the radius( $r^*$ ) as 12 and 10 in these cases and the corresponding LFC in the spatial domain when passed to the model ( $T_m$ ) yields correct predictions.

\*denotes equal contribution.

## 2. Performance of Proposed Detection Module using different Arbitrary Datasets

As described in Sec. 4.1 in the main draft, the target detector model  $F_t$  is trained by adapting the source-detector model  $F_s$ . The model  $F_s$  comprises of  $S_m$  and  $L_{advdet}$  where  $S_m$  is trained on an arbitrary dataset  $D_{arbitrary}$ . Hence, to assess the effect of the choice of  $D_{arbitrary}$  on the detection module and consequently our proposed method DAD (combined detection and correction), we conduct experiments on two distinct source datasets for each target dataset (i.e. CIFAR-10 and FMNIST) in addition to the results provided on TinyImageNet [1] (as source dataset) in the Table 1 in the main draft. We perform experiments with FMNIST and MNIST as  $D_{arbitrary}$  for CIFAR-10, while MNIST and CIFAR-10 as  $D_{arbitrary}$  for FMNIST. Similar to the results presented in Table 1 in the main draft, we observe from Table 1 (shown below) that we achieve impressive detection accuracy across both the target datasets for each corresponding source dataset ( $D_{arbitrary}$ ).

| Target Dataset | Source Dataset (Arbitrary Data) | Detection Accuracy | Clean Accuracy | Adversarial Accuracy |
|----------------|---------------------------------|--------------------|----------------|----------------------|
| CIFAR-10       | MNIST                           | 93.03              | 99.98          | 86.08                |
|                | FMNIST                          | 93.54              | 99.85          | 87.23                |
| FMNIST         | MNIST                           | 88.51              | 99.03          | 77.99                |
|                | CIFAR-10                        | 84.41              | 84.07          | 84.75                |

Table 1. Results (in %) of our proposed detection module comprising clean and adversarial detection accuracy along with overall detection accuracy on Auto Attack, are reported for different target datasets ( $D_{test}$ , i.e. CIFAR-10 and FMNIST). For each target dataset, we also vary the source dataset ( $D_{arbitrary}$ ) which is completely different and arbitrary to the target dataset in terms of dissimilar semantics and non-overlapping categories.

## 3. Combined (Detection and Correction) Performance on other attacks

In order to evaluate the efficacy of our proposed approach (DAD) across a wide variety of attacks, we extend the analysis on combined performance presented in Sec. 6 and Fig. 3 of the main draft on the state-of-the-art Auto Attack to other popular attacks such as PGD and IFGSM. We observed from Table 2 that we achieve a respectable adversarial accuracy of more than 35% on CIFAR-10 and more than 21% on FMNIST across architectures (Resnet-18 and Resnet-34) on both the attacks while maintaining reasonable clean accuracy.

| Dataset  | Model    | PGD            |                      | IFGSM          |                      |
|----------|----------|----------------|----------------------|----------------|----------------------|
|          |          | Clean Accuracy | Adversarial Accuracy | Clean Accuracy | Adversarial Accuracy |
| CIFAR-10 | resnet18 | 89.01          | 36.38                | 85.49          | 35.44                |
|          | resnet34 | 88.28          | 37.92                | 88.61          | 31.94                |
| FMNIST   | resnet18 | 90.09          | 21.29                | 88.17          | 23.15                |
|          | resnet34 | 90.45          | 21.79                | 90.57          | 22.21                |

Table 2. Performance of our proposed method (DAD) on PGD and IFGSM adversarial attacks where we report the overall clean and adversarial accuracy (in %) across different architectures i.e. Resnet-18 and Resnet-34 for CIFAR-10 and FMNIST.

## 4. Combined (Detection and Correction) Performance on MNIST

In this section, we evaluate our proposed combined module (detection module followed by correction module) solution strategy, i.e., DAD on the MNIST dataset [2], apart from FMNIST and CIFAR presented in Sec. 6 (Figure 3) of the main draft, to further validate our framework’s performance.

We provide combined results on three distinct choices of  $D_{arbitrary}$  i.e. CIFAR-10, FMNIST, and TinyImageNet for our target dataset MNIST ( $D_{test}$ ). We observed (in Table 3) that we achieve a significant boost in the adversarial accuracy across all three choices, without compromising much on the clean accuracy. These results verify that DAD can achieve good performance on a wide range of target datasets ( $D_{test}$ ) for different choices of the source datasets ( $D_{arbitrary}$ ). Please note the clean accuracy and adversarial accuracy of  $T_m$  (resnet18) without our framework was 99.29% and 0.00% respectively against state-of-the-art Auto Attack.

| Source (arbitrary)<br>Dataset | Model    | Auto Attack    |                      |
|-------------------------------|----------|----------------|----------------------|
|                               |          | Clean Accuracy | Adversarial Accuracy |
| CIFAR-10                      | resnet18 | 90.46          | 34.77                |
| FMNIST                        | resnet18 | 96.12          | 31.15                |
| TinyImageNet                  | resnet18 | 90.29          | 33.19                |

Table 3. Results (in %) on MNIST using our proposed DAD framework containing detection and correction modules. In the detection module, the target detection model ( $F_t$ ) is obtained by adapting the source detection model ( $F_s$ ) using source-free UDA. The model  $S_m$  is appended with detection layers to form  $F_s$ . So, we also report the performances for different choices of dataset  $D_{arbitrary}$  (i.e. CIFAR-10, FMNIST and TinyImageNet) on which  $S_m$  is trained.

## 5. Attack Parameters for various arbitrary datasets

| Source/arbitrary datasets | $\epsilon$ | $\epsilon_{step}$ | Number of iterations |
|---------------------------|------------|-------------------|----------------------|
| TinyImageNet              | 8/255      | 2/255             | 20                   |
| MNIST                     | 0.3        | 0.01              | 100                  |
| CIFAR-10                  | 8/255      | 2/255             | 20                   |
| FMNIST                    | 0.2        | 0.02              | 100                  |

Table 4. The parameter values for PGD attack taken across different datasets for creating the adversarial dataset ( $A_{arbitrary}$ ).

## 6. Distribution of selected radius across samples

As motivated in the Sec. 4.2 of the main draft, our correction Algorithm 1 estimates a suitable radius ( $r^*$ ) entirely at the test time for each incoming sample without assuming any prior knowledge either about the training dataset or the adversarial attack. We demonstrated the importance of selecting  $r^*$  optimally in Table 3 of the main draft by comparing our correction algorithm’s performance with a random baseline (R.B.) (wherein a random radius is selected for each sample). We observed that although R.B.’s performance varied across datasets (being higher for CIFAR-10 than FMNIST), it was comfortably outperformed by our correction algorithm.

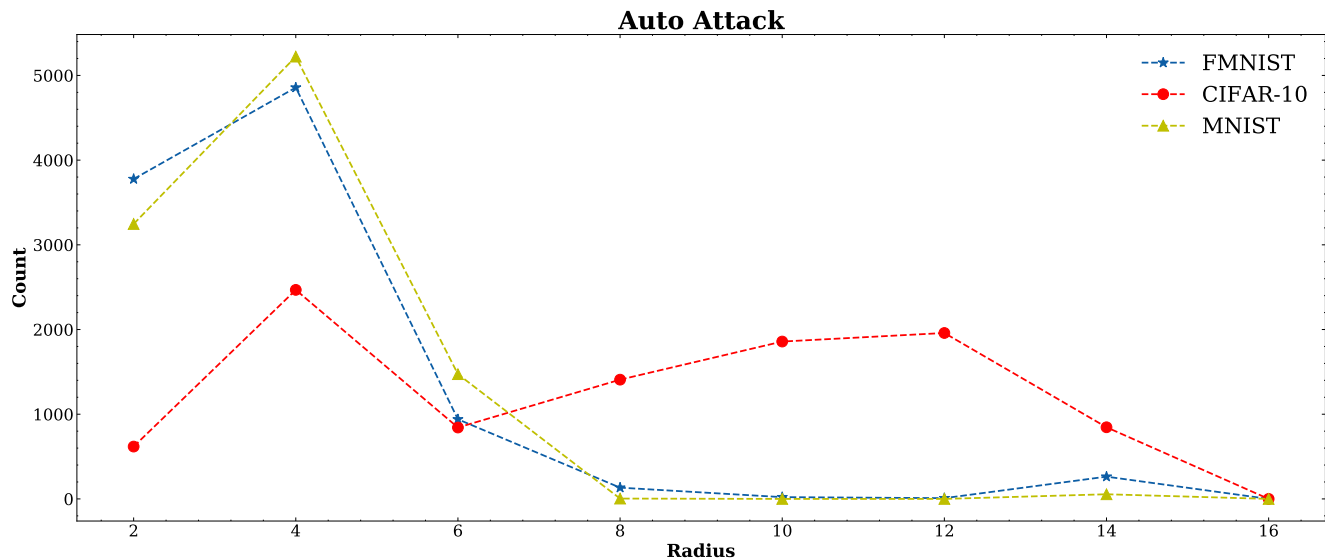

Figure 2. Distribution of radius selected by our proposed correction module on **Auto Attack** adversarial samples across different target datasets i.e. FMNIST, CIFAR-10 and MNIST.

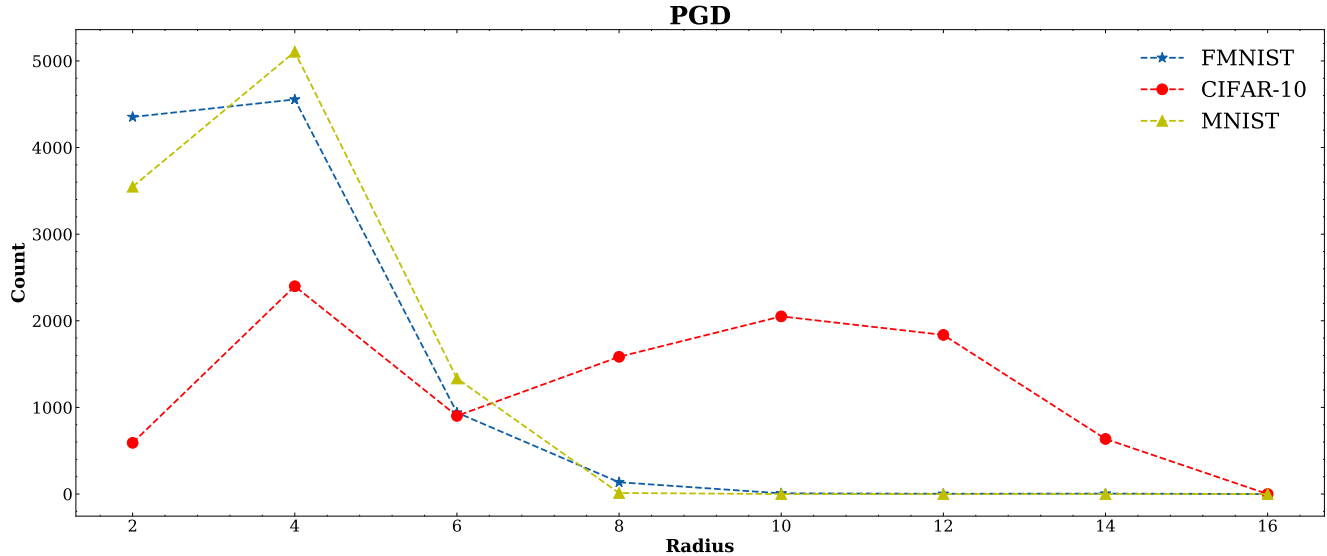

Figure 3. Distribution of radius selected by our proposed correction module on **PGD** Attack adversarial samples across different target datasets i.e. FMNIST, CIFAR-10 and MNIST.

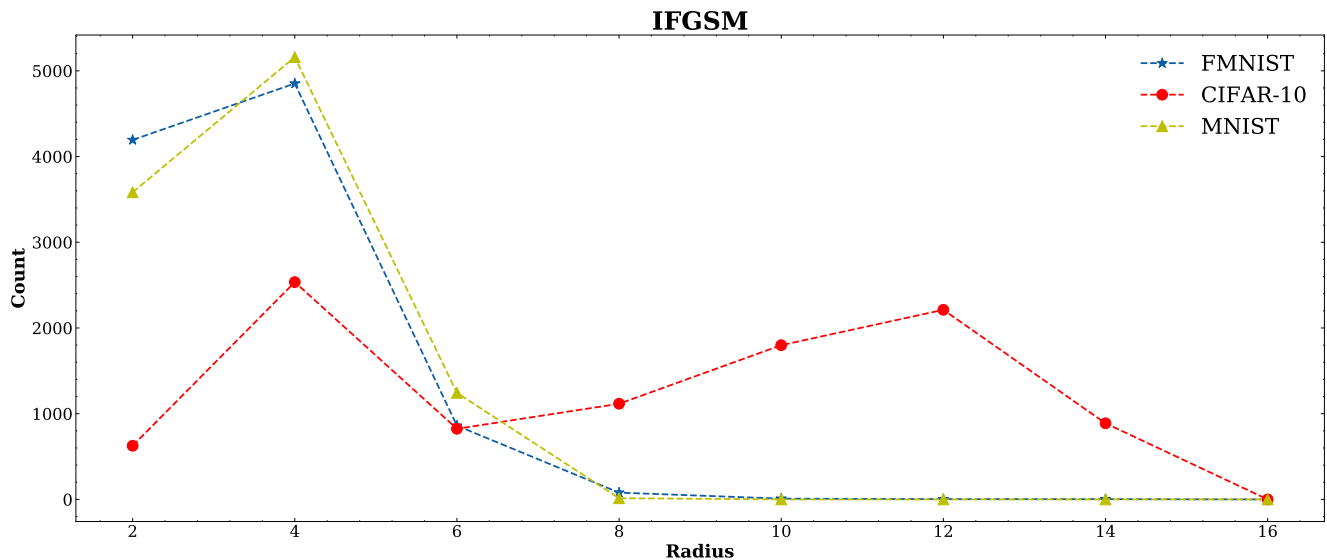

Figure 4. Distribution of radius selected by our proposed correction module on **IFGSM** Attack adversarial samples across different target datasets i.e. FMNIST, CIFAR-10 and MNIST.

In order to investigate the selection of  $r^*$  from another perspective, we plot the frequency distribution of  $r^*$  for various attacks on Resnet-18 ( $T_m$ ) trained on multiple datasets as shown in Figures 2, 3 and 4. We observe that for MNIST and FMNIST datasets  $r^*$  is majorly selected at a lower radius, whereas for the CIFAR-10 dataset the frequency distribution loosely resembles the uniform distribution. This explains the decent performance of R.B. on CIFAR-10 in Table 3 of the main draft. More importantly, the figures indicate that  $r^*$  can significantly vary across datasets (MNIST/FMNIST vs CIFAR-10). Moreover,  $r^*$  can even vary across samples of a particular dataset (For *e.g.* in CIFAR-10 samples, different radius are almost equi-proportionally selected). Our algorithm is able to accurately estimate  $r^*$  on a sample-by-sample basis without any prior knowledge about the training dataset or the corresponding adversarial attack, as evident by the impressive performance shown in Table 2 of the main draft.

We further compare our performance of a) carefully choosing a constant radius (for all the samples) with b) sample-level radius selection (finer-granularity control) i.e.  $r^*$ , through our proposed algorithm. We select the constant radius as  $r = 4$  since it's the most frequently selected radius by our algorithm across different types of attacks and datasets (as shown in

Figures 2, 3 and 4). We observe that the sample-level selection strategy often provides significant improvements (shown in Table 5). For e.g. in CIFAR-10 we observe  $\approx 16 - 18\%$  improvement by our algorithm over choosing a constant radius ( $r = 4$ ). However, we do notice on the MNIST dataset we observe slightly lower performance. Please note that our proposed algorithm obtains non-trivial improvement in adversarial accuracy even when choosing a constant radius or selecting radius at the sample level. We prefer the sample-level radius selection approach, as we often obtain a large gain in performance across a number of architecture, attack, and datasets configurations.

| Dataset  | Attack      | Performance (in %) ( $r = 4$ ) | Performance (in %) ( $r^*$ selected at sample level) |
|----------|-------------|--------------------------------|------------------------------------------------------|
| CIFAR-10 | pgd         | 22.08                          | 39.39                                                |
|          | ifgsm       | 22.26                          | 38.49                                                |
|          | auto attack | 22.37                          | 40.25                                                |
| FMNIST   | pgd         | 27.16                          | 32.22                                                |
|          | ifgsm       | 27.84                          | 32.38                                                |
|          | auto attack | 30.74                          | 35.80                                                |
| MNIST    | pgd         | 47.59                          | 44.6                                                 |
|          | ifgsm       | 48.63                          | 44.76                                                |
|          | auto attack | 48.76                          | 45.81                                                |

Table 5. Performance comparison of a) choosing a constant radius  $r = 4$  v/s b) sample-level selection strategy i.e.  $r^*$

## References

- [1] Ya Le and Xuan Yang. Tiny imagenet visual recognition challenge. *CS 231N*, 7(7):3, 2015.
- [2] Yann LeCun, Léon Bottou, Yoshua Bengio, and Patrick Haffner. Gradient-based learning applied to document recognition. *Proceedings of the IEEE*, 86(11):2278–2324, 1998.
